# Supplementary material for: Does the choice of applied physiologically‐based pharmacokinetics platform matter? A case study on simvastatin disposition and drug–drug interaction
Source: PubMed Central journal article supplement — CPT Pharmacometrics Syst Pharmacol. 2022 Jul 16;11(9):1194–209. doi: 10.1002/psp4.12837 (PMC9469690; doi:10.1002/psp4.12837), 2022-07-16

**Simcyp platform**  
**PK-Sim platform**

UGT1A1 lactonization liver

PON1 lactonization  
plasma

Plasma esterase &  
CES1 liver

PON1 plasma &  
CES1 liver

OATP1B1  
uptake in liver

OATP1B1  
uptake in liver

BCRP efflux

BCRP efflux

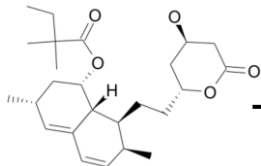

Simvastatin Lactone

CYP3A4  
metabolism

CYP3A4  
metabolism

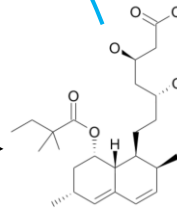

Simvastatin Acid

Non-specific  
metabolism

Non-specific  
metabolism

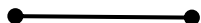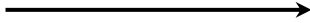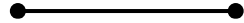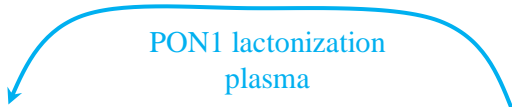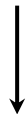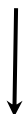

Supplement: PSP4-11-1194-s002.pdf [file PSP4-11-1194-s002.pdf]
